# Supplementary material
Source: PubMed Central journal article supplement (PMC3717610)

## LO-AD WM cingulum atrophy

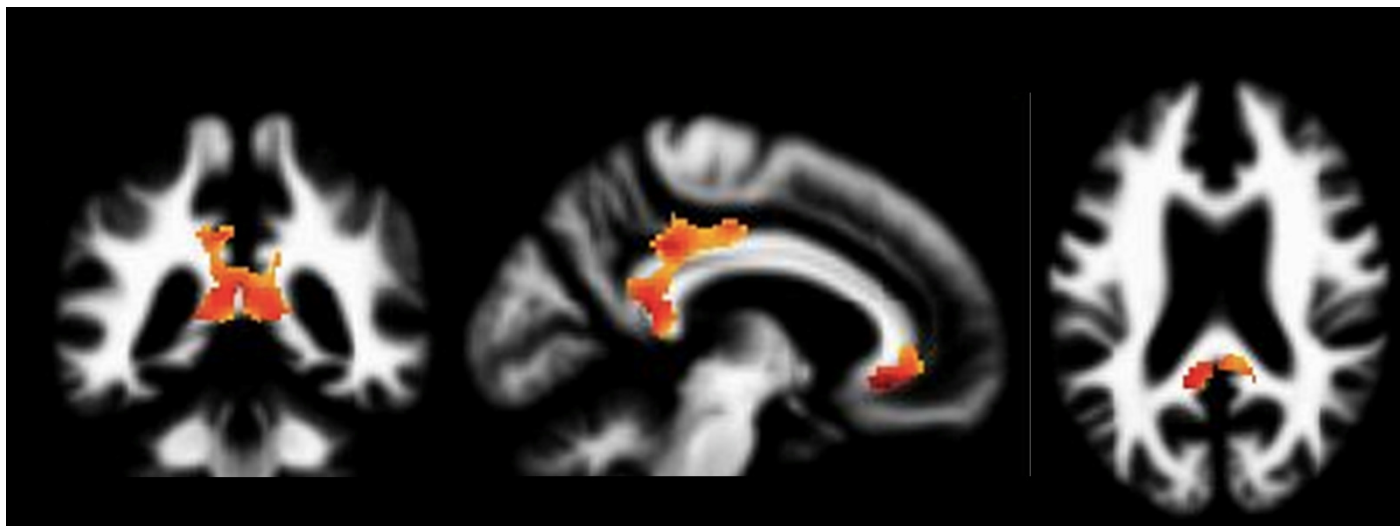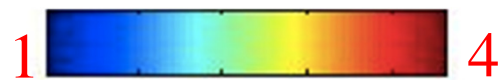

## Grey matter atrophy in LO-AD

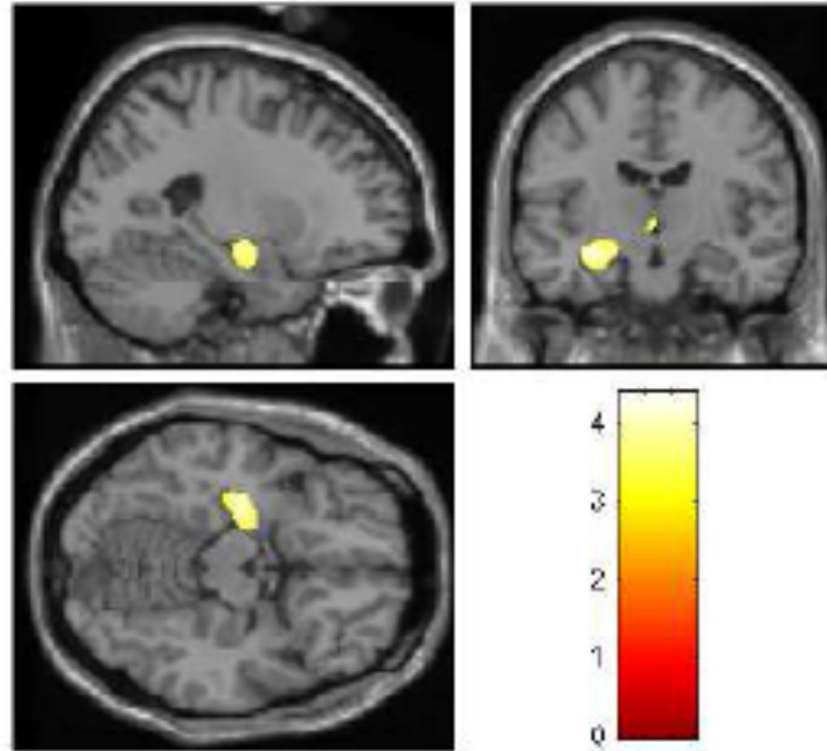

Supplement: NIHMS482149-supplement-Supp_Figures.pdf [file NIHMS482149-supplement-Supp_Figures.pdf]
